# Supplementary material
Source: HighWire-hosted journal article supplement (https://ejhp.bmj.com/highwire/filestream/152182/field_highwire_adjunct_files/1/ejhpharm-2021-003095supp002_data_supplement.pdf)
Supplement: ejhpharm-2021-003095supp002_data_supplement.pdf [file ejhpharm-2021-003095supp002_data_supplement.pdf]

## Development and Delphi validation of a Best Possible Medication History form

C. Hoornaert<sup>1</sup>, S. Pochet<sup>2</sup>, S. Lorent<sup>3</sup>

Camille Hoornaert, Clinical Pharmacist  
Hôpital Erasme, Pharmacy Department  
808, route de Lennik, 1070 Brussels, Belgium  
[camille.hoornaert@erasme.ulb.ac.be](mailto:camille.hoornaert@erasme.ulb.ac.be)

### Qualitative analysis per tab per round

| Theme                                                  | Round 1        | Round 2        | Round 3                        |
|--------------------------------------------------------|----------------|----------------|--------------------------------|
|                                                        | Frequency<br>% | Frequency<br>% | Frequency<br>%                 |
| <b>Tabs 1 : general information</b>                    |                |                |                                |
| Add information about the patient's clinical condition | 7%             |                |                                |
| Add date                                               | 4%             |                |                                |
| Add the function of the care provider                  | 4%             |                |                                |
| Add patient's name                                     | 4%             |                | Included 2 <sup>nd</sup> round |
| Add the name of the care provider                      | 11%            |                |                                |
| To clarify wording                                     | 7%             | 4%             |                                |
| Move to the beginning of the document                  | 14%            |                |                                |
| Lack of space to write                                 | 7%             |                |                                |
| Downsize                                               |                | 4%             |                                |
| <b>Tabs 2: medication</b>                              |                |                |                                |
| Add treatment lines                                    | 14%            |                |                                |
| Add an indication column                               | 11%            |                |                                |
| Add an medication chronic and acute/on demand column   | 7%             |                | Included 2 <sup>nd</sup> round |
| Lack of space to write                                 | 18%            |                |                                |
| <b>Tabs 3: home medication management</b>              |                |                |                                |
| To clarify wording                                     | 4%             |                | Included 2 <sup>nd</sup> round |
| Lack of space to write                                 | 7%             |                |                                |
| <b>Tabs 4: questions about medication</b>              |                |                |                                |
| Add a item                                             | 4%             |                |                                |
| To clarify wording                                     | 14%            | 13%            | Included 2 <sup>nd</sup> round |
| Lack of space to write                                 | 4%             | 4%             |                                |
| <b>Tabs 5: allergies/side effects</b>                  |                |                |                                |
| To clarify wording                                     | 11%            |                |                                |
| Lack of space to write                                 | 4%             |                | Included 1 <sup>st</sup> round |
| Downsize                                               | 7%             |                |                                |
| <b>Tabs 6: medication adherence</b>                    |                |                |                                |
| To clarify wording                                     | 4%             |                |                                |
| Lack of space to write                                 | 11%            |                | Included 1 <sup>st</sup> round |
| <b>Tabs 7 : remarks</b>                                |                |                |                                |
| To clarify wording                                     | 4%             |                |                                |
| Retain                                                 | 7%             |                | Excluded 1 <sup>st</sup> round |
| To exclude                                             | 14%            |                |                                |

## Qualitative analysis per item per round

| Theme                                                 | Round 1        | Round 2        | Round 3                           |
|-------------------------------------------------------|----------------|----------------|-----------------------------------|
|                                                       | Frequency<br>% | Frequency<br>% | Frequency<br>%                    |
| <b>Item 1: medication chronic and acute/on demand</b> |                |                |                                   |
| To clarify wording                                    | 4%             | 13%            | Included 2 <sup>nd</sup><br>round |
| Lack of space to write                                | 4%             |                |                                   |
| <b>Item 2: lifestyle</b>                              |                |                |                                   |
| Retain                                                |                | 9%             | Included 2 <sup>nd</sup><br>round |
| Exclude                                               | 14%            | 13%            |                                   |
| To clarify wording                                    | 11%            |                |                                   |
| Repetitive                                            |                | 17%            |                                   |
| <b>Item 3: sources</b>                                |                |                |                                   |
| Retain                                                |                |                | 35%                               |
| Exclude                                               | 11%            | 4%             |                                   |
| Add a proposed response                               | 11%            |                |                                   |
| To clarify wording                                    | 25%            | 9%             |                                   |
| Move to the beginning of the document                 | 7%             |                |                                   |
| Increased accuracy                                    | 7%             |                |                                   |
| Repetitive                                            | 25%            | 17%            | 20%                               |
| <b>Item 4: sources table</b>                          |                |                |                                   |
| Add a proposed response                               | 21%            |                |                                   |
| To clarify wording                                    | 11%            | 4%             | Included 2 <sup>nd</sup><br>round |
| Lack of space to write                                | 7%             |                |                                   |
| Redondant                                             | 7%             |                |                                   |
| <b>Item 5: medication</b>                             |                |                |                                   |
| To clarify wording                                    | 14%            | 4%             | Included 2 <sup>nd</sup><br>round |
| Lack of space to write                                | 4%             |                |                                   |
| <b>Item 6: dosage</b>                                 |                |                |                                   |
| Add the notion of fasting                             | 7%             | 9%             | Included 2 <sup>nd</sup><br>round |
| <b>Item 7: remarks</b>                                |                |                |                                   |
| To clarify wording                                    | 11%            |                | Included 2 <sup>nd</sup><br>round |
| Lack of space to write                                | 21%            | 22%            |                                   |
| <b>Item 8: self-medication</b>                        |                |                |                                   |
| Retain                                                |                | 26%            |                                   |
| To clarify wording                                    | 18%            |                |                                   |
| Move in the medication therapy table                  | 14%            |                | Included 2 <sup>nd</sup><br>round |
| Move in tabs 4                                        | 7%             |                |                                   |
| Lack of space to write                                | 11%            |                |                                   |
| Repetitive                                            |                | 43%            |                                   |
| <b>Item 9: medication management</b>                  |                |                |                                   |

|                                                           |                             |     |                                |
|-----------------------------------------------------------|-----------------------------|-----|--------------------------------|
| Add a proposed response "other"                           | 7%                          |     |                                |
| Add a proposed response                                   | 21%                         |     |                                |
| To clarify wording                                        | 4%                          | 4%  | Included 2 <sup>nd</sup> round |
| Reverse the relative and home nursing response proposal   | 11%                         |     |                                |
| Lack of space to write                                    | 4%                          |     |                                |
| <b>Item 10: assistance in medication management</b>       |                             |     |                                |
| Add a proposed response "pharmacist's medication regimen" | 4%                          |     |                                |
| To clarify wording                                        | 36%                         |     |                                |
| <b>Item 11: patients' personal treatment</b>              |                             |     |                                |
| To clarify wording                                        | 36%                         |     | Included 2 <sup>nd</sup> round |
| Move in tabs 2                                            | 4%                          |     |                                |
| <b>Item 12: medication in the form of</b>                 |                             |     |                                |
| To exclude                                                |                             | 4%  |                                |
| Memory-aids/ checklist                                    |                             | 9%  |                                |
| Add a proposed response                                   | 21%                         |     | Included 2 <sup>nd</sup> round |
| To clarify wording                                        | 29%                         | 30% |                                |
| Repetitive                                                | 7%                          |     |                                |
| <b>Item 13: medication for</b>                            |                             |     |                                |
| Exclude                                                   |                             | 9%  |                                |
| Memory-aids/ checklist                                    |                             | 13% |                                |
| Add a proposed response                                   | 36%                         | 4%  | Included 2 <sup>nd</sup> round |
| To clarify wording                                        | 21%                         | 35% |                                |
| <b>Item 14: vaccination</b>                               |                             |     |                                |
| Retain                                                    |                             |     | 20%                            |
| Add a item                                                |                             | 4%  |                                |
| To clarify wording                                        |                             |     | 5%                             |
| Information difficult to collect from the patient         | Added 3 <sup>rd</sup> round |     | 20%                            |
| Information difficult to collect from the pharmacist      |                             |     | 10%                            |
| <b>Item 15: change in your medication</b>                 |                             |     |                                |
| To clarify wording                                        | 11%                         |     | Included 2 <sup>nd</sup> round |
| Justify the duration                                      |                             | 4%  |                                |
| <b>Item 16: antibiotic</b>                                |                             |     |                                |
| To clarify wording                                        | 21%                         | 4%  | Included 2 <sup>nd</sup> round |
| Justify the duration                                      |                             | 4%  |                                |
| <b>Item 17: swallowing difficulties</b>                   |                             |     |                                |
| Move in tabs 3                                            | 4%                          |     | Included 2 <sup>nd</sup> round |
| Group with item 18                                        | 4%                          |     |                                |
| <b>Item 18: terms of use</b>                              |                             |     |                                |
| Retain                                                    |                             |     | 70%                            |
| Exclude                                                   |                             | 17% |                                |
| Memory-aids/ checklist                                    |                             |     | 15%                            |
| Time-consuming                                            |                             |     | 5%                             |

|                                                                  |     |     |                                |
|------------------------------------------------------------------|-----|-----|--------------------------------|
| To clarify wording                                               | 25% | 9%  | 5%                             |
| Lack of space to write                                           | 4%  |     |                                |
| <b>Item 19: allergies</b>                                        |     |     |                                |
| To clarify wording                                               |     | 4%  | Included 2 <sup>nd</sup> round |
| <b>Item 20: side effects</b>                                     |     |     |                                |
| Exclude                                                          |     | 4%  |                                |
| To clarify wording                                               | 7%  |     | Included 2 <sup>nd</sup> round |
| Lack of space to write                                           | 4%  |     |                                |
| <b>Item 21: medication available to the hospital's formulary</b> |     |     |                                |
| To exclude                                                       | 14% |     |                                |
| To clarify wording                                               | 25% |     | Excluded 1 <sup>st</sup> round |
| Reduce the column                                                | 21% |     |                                |
| <b>Item 22: comments</b>                                         |     |     |                                |
| Exclude                                                          | 11% |     |                                |
| To clarify wording                                               | 14% |     | Excluded 1 <sup>st</sup> round |
| Lack of space to write                                           | 4%  |     |                                |
| <b>Item 23: ©Morisky Medication Adherence Scale</b>              |     |     |                                |
| Retain                                                           |     |     | 50%                            |
| Exclude                                                          |     | 30% |                                |
| To clarify wording                                               | 7%  |     |                                |
| EBM <sup>1</sup>                                                 |     | 4%  |                                |
| Lack of time                                                     | 7%  | 4%  |                                |
| Patient reluctance                                               | 7%  | 4%  |                                |
| <b>Layout of the document</b>                                    |     |     |                                |
| Enlarge checkboxes                                               |     | 4%  |                                |
| Create a computerized version                                    |     |     | 5%                             |
| Keep the double-sided format                                     |     |     | 35%                            |
| Lack of space to write                                           | 25% | 9%  | 15%                            |
| Patient unable to complete BPMH                                  |     | 4%  | 30%                            |
| Use landscape format                                             |     | 9%  | 10%                            |

<sup>1</sup>EBM : Evidence-Based Medicine
